# Supplementary material for: Microfluidic acoustic sawtooth metasurfaces for patterning and separation using traveling surface acoustic waves
Source: Royal Society of Chemistry journal article supplement (doi:10.1039/d1lc00711d), 2021-12-03
Supplement: d1lc00711d1.pdf [file d1lc00711d1.pdf]

## Supplementary Information

### Microfluidic acoustic sawtooth metasurfaces for patterning and separation using traveling surface acoustic waves

Mingxin Xu, Peter VS Lee, David Collins\*

Department of Biomedical Engineering, University of Melbourne, Melbourne, Victoria, Australia

\* Corresponding author

E-mail: [david.collins@unimelb.edu.au](mailto:david.collins@unimelb.edu.au)

#### Supplementary Note 1: Analytical formal and derivation for non-integer $k$ values

As shown in Fig. S1(a),  $L_{div}$  is defined as the length of the fringe produced by a single sawtooth element (equals to the length of the hypotenuse of each triangle element), written as

$$L_{div} = \frac{h_{st}}{\sin \theta_{st}}, \quad (S1)$$

Fig. S1(b) is the expanded view of Fig. S1(a). The distance between the two fringes is  $k\lambda_{\theta} - h_{\theta}$ , where the blue line represents the resulting divergent fringe. The angle at which the divergent

fringe increases relative to  $\theta_{st}$  is defined as  $\theta_{inc}^{+}$ , which is calculated as:

21

$$\theta_{inc}^+ = \tan^{-1} \left( \frac{k\lambda_\theta - h_\theta}{L_{div}} \right), \quad (S2)$$

22

23 where  $h_\theta = h_{st} \cos \theta_{st}$ .

24

25 For  $\theta_{div}^+ = \theta_{st} + \theta_{inc}^+$  (superscript “+” denoting a  $\theta_{div}$  is larger than  $\theta_{st}$ ), rewriting equations (S1)

26 and (S2) with  $\theta_{div}^+$ , this becomes

27

$$\theta_{div}^+ = \theta_{st} + \theta_{inc}^+ = \theta_{st} + \tan^{-1} \left( \frac{(k\lambda_\theta - h_\theta) \sin \theta_{st}}{h_{st}} \right) \quad (S3)$$

28

29 Conversely, for  $\theta_{div}$  slightly smaller than  $\theta_{st}$ , this expression incorporating  $\theta_{div}^-$  (superscript

30 “-” for  $\theta_{div}$  is slightly smaller than  $\theta_{st}$ ) is expressed as:

31

$$\theta_{div}^- = \theta_{st} - \theta_{inc}^- = \theta_{st} - \tan^{-1} \left( \frac{(h_\theta - k\lambda_\theta) \sin \theta_{st}}{h_{st}} \right). \quad (S4)$$

32

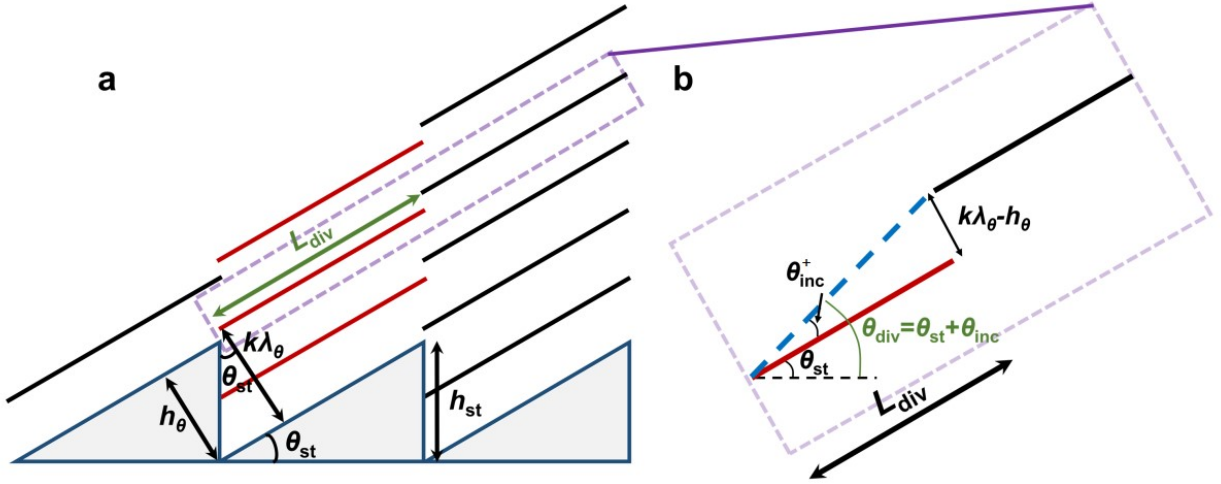

35  
 36 **FIG. S1.** Analytical approach for predicting the resulting  $\theta_{div}$  where  $k$  is a non-integer value. (a)

37 Here for  $h_{\theta}^{-} \lesssim k\lambda_{\theta}$ , with (b) showing an expanded analysis of these fringes.

38

39 The analytical results calculated based on equations (S3) and (S4) are shown in Fig. S2.

40 Corresponding simulation results are shown in Fig. 2(b).

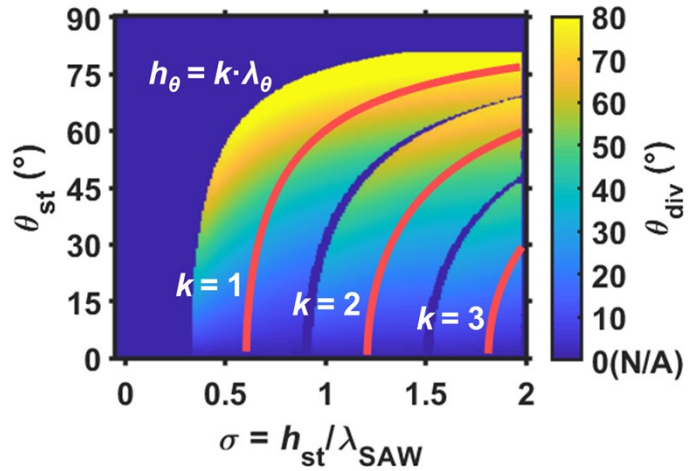

41

42 **FIG. S2.** Analytical modelling results, plotting  $\theta_{div}$  as a function of  $\theta_{st}$  and  $\sigma$ , overlaid with red  
 43 lines corresponding to  $k = 1$ ,  $k = 2$  and  $k = 3$ .

44

45 **Supplementary Note 2: Deriving generalized Snell's law for the proposed metasurfaces.**

46

47 For acoustic waves that incident perpendicular to the metasurface (the incidence angle is 0), the  
48 generalized Snell's law of refraction is written as [1]:

49

50 
$$\frac{1}{\lambda_\theta} \sin(\theta_t) = \frac{1}{2\pi} \frac{d\varphi(y)}{dy}, \quad (S5)$$

51

52 Where the fringe spacing  $\lambda_\theta$  is described in equation (1),  $\theta_t$  is the equivalent refraction angle  
53 (equal to  $\theta_{div}$ ) as shown in Fig. S3.  $dy$  is the length along the y axis for which the equivalent  
54 phase shift ( $d\varphi(y)$ ) is equal to  $2\pi$ .

55

56 As shown in Fig. S3,  $dy = w_{st}/k$ , where  $w_{st} = h_{st}/\tan(\theta_{st})$ . Therefore,  $dy$  is expressed as:

57

58 
$$dy = \frac{h_{st}}{k \tan(\theta_{st})}. \quad (S6)$$

59

60 Substituting equation (S6) into equation (S5) with  $d\varphi(y) = 2\pi$ , and rewriting equation (S5)  
61 yields the generalized Snell's law for our sawtooth metasurfaces:

62

63 
$$\frac{1}{\lambda_\theta} \sin(\theta_{div}) = \frac{k \tan(\theta_{st})}{h_{st}}, \quad (S7)$$

64

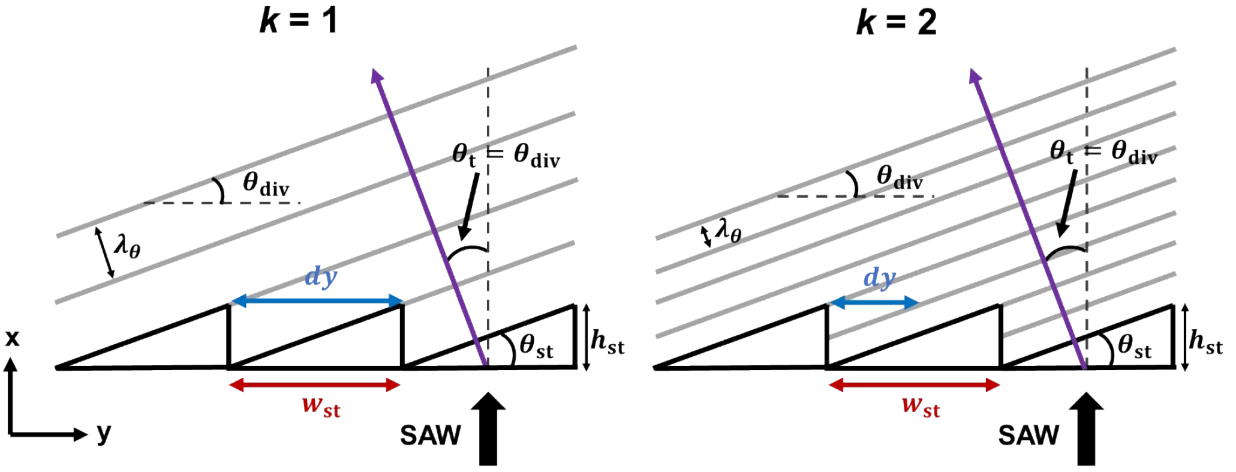

65

66 **FIG. S3.** Schematic diagram of deriving generalized Snell's law. For  $k = 1$  and  $k = 2$ .

67

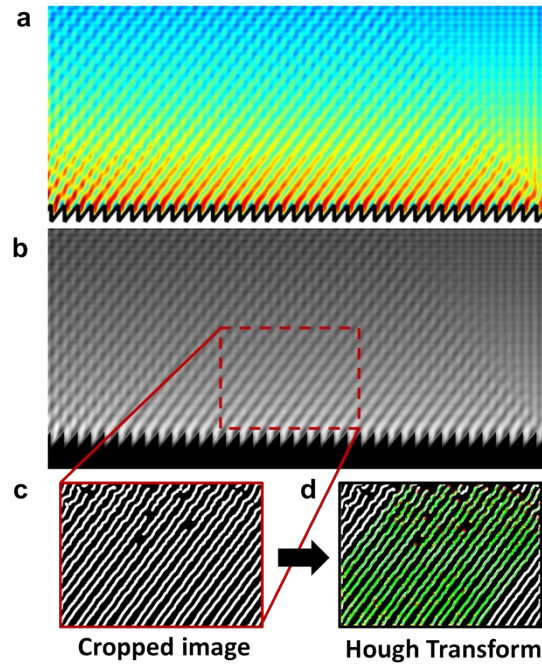

69

70 **FIG. S4.** Example of Hough transform with  $\sigma = 0.84$  and  $\theta_{st} = 51.8^\circ$ . (a) The simulated acoustic  
 71 pressure field. (b) Grayscale remapping of acoustic pressure field. (c) A cropped image segment,  
 72 where the edge features are detected by the edge function. (d) The lines are detected by the  
 73 Hough transform, where the angle of each line can be extracted.

74

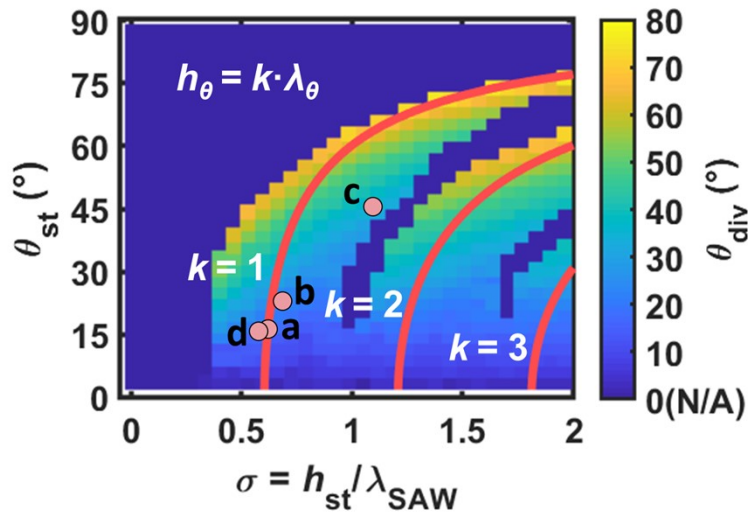

75

76 **FIG. S5.** Simulation results, where each marked point corresponds to the sub-figure number in  
 77 Fig. 4.

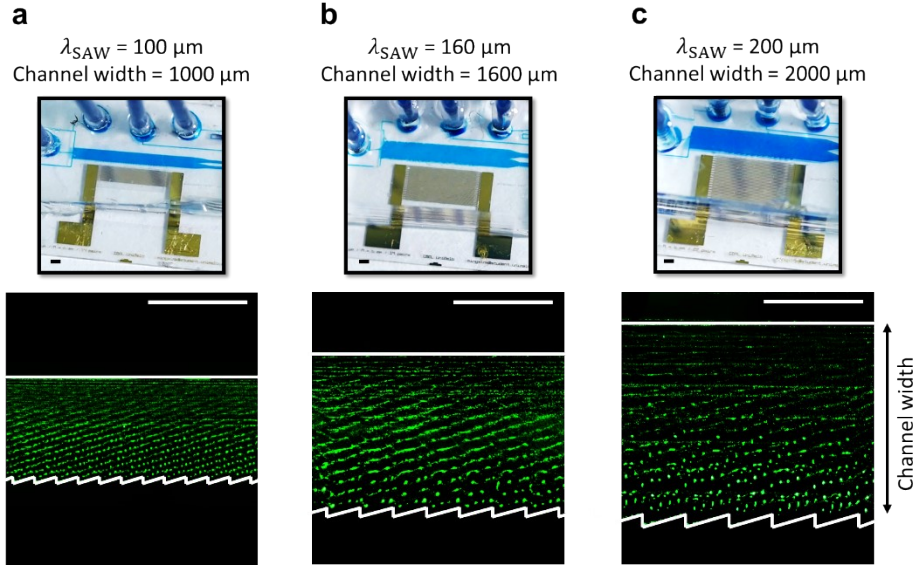

78

79 **FIG. S6.** Experimental results with various wavelengths and channel widths, where  
 80  $h_{st} = 0.62\lambda_{SAW}$ ,  $\theta_{st} = \theta_{div} = 16.2^\circ$ , and  $k = 1$  for each design. (a)  $\lambda_{SAW} = 100 \mu m$  and  
 81  $channel\ width = 1000 \mu m$ . (b)  $\lambda_{SAW} = 160 \mu m$  and  $channel\ width = 1600 \mu m$ . (c)  $\lambda_{SAW} = 200 \mu m$  and  
 82  $channel\ width = 2000 \mu m$ . Scale bars are  $1000 \mu m$ .

83

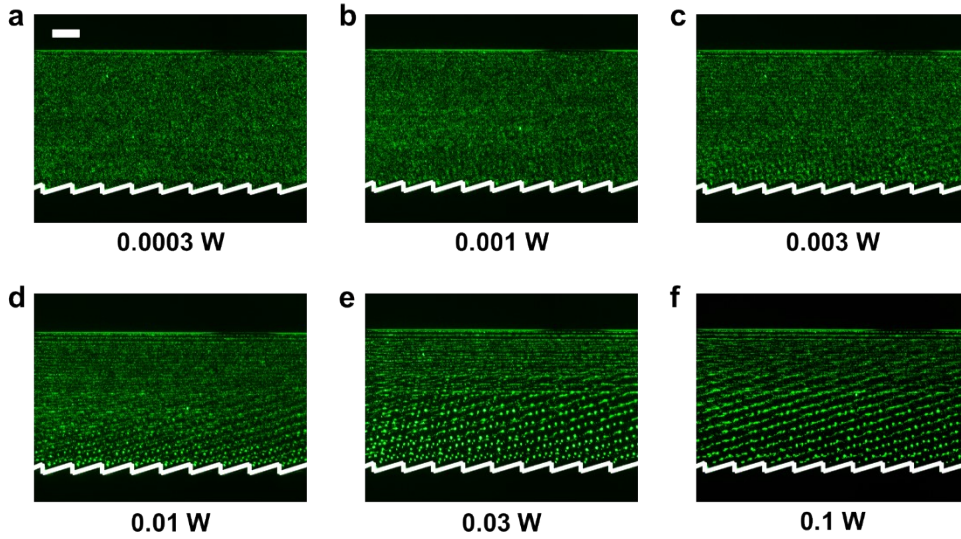

84

85 **FIG. S7.** Input power effects. Experimental results with  $\lambda_{SAW} = 100 \mu m$  and  $k = 1$ , for the input  
86 power of the transducer is (a) 0.0003 W, (b) 0.001 W, (c) 0.003 W, (d) 0.01 W, (e) 0.03 W, and  
87 (f) 0.1 W. Scale bars is 200  $\mu m$ .

88

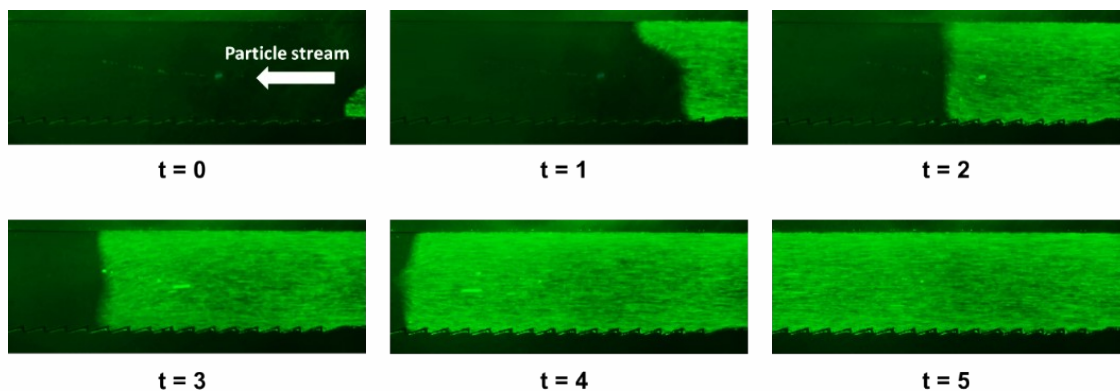

90 **FIG. S8.** Experimental results demonstrating filling without bubble formation at low perfusion  
91 flow rates ( $\sim 7 \mu L/min$ ).



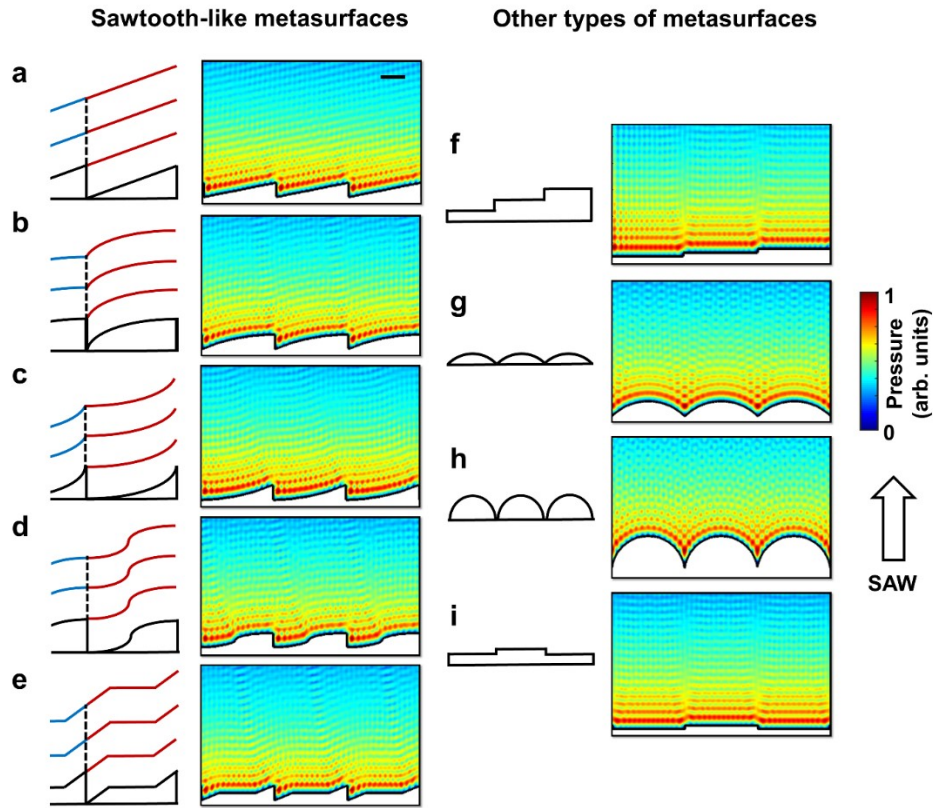

92

93 **FIG. S9.** Examples and acoustic pressure field simulations of sawtooth-like metasurfaces and  
 94 other metasurfaces with  $\lambda_{SAW} = 100 \mu m$ . (a)-(e) Sawtooth-like metasurfaces. The pattern generated  
 95 by each sawtooth-like element has the same length at the dotted line to form spatially continuous  
 96 patterns, where the spacing of the pattern at a given  $\theta_{st}$  can be calculated by equation (1). (f)-(i)  
 97 Other types of metasurfaces. Scale bar is  $100 \mu m$ .

## 98 Reference

- 99 1. Tian Z, Shen C, Li J, Reit E, Gu Y, Fu H, et al. Programmable Acoustic Metasurfaces. Adv  
 100 Funct Mater. 2019 Mar;29(13):1808489.

101
